# Supplementary material for: Lipoprotein X Causes Renal Disease in LCAT Deficiency
Source: PubMed Central journal article supplement (PMC4769176; doi:10.1371/journal.pone.0150083), 2016-02-26

### S3: Macropinocytotic uptake of LpX by normal renal glomerular endothelial cells

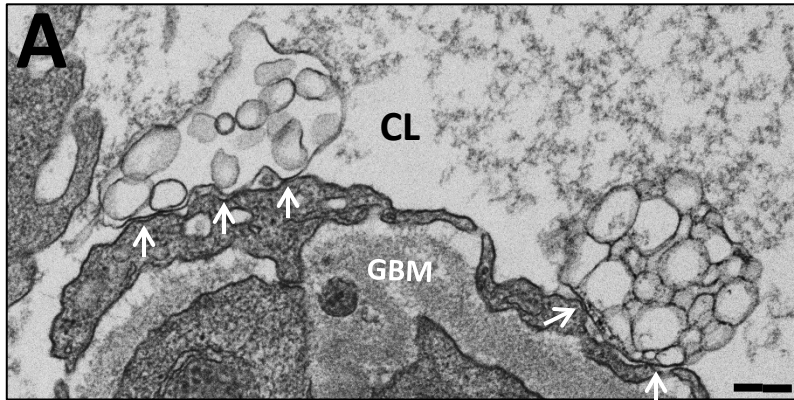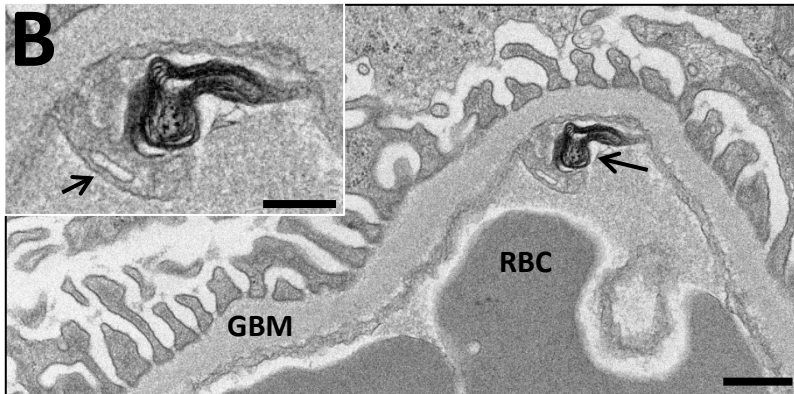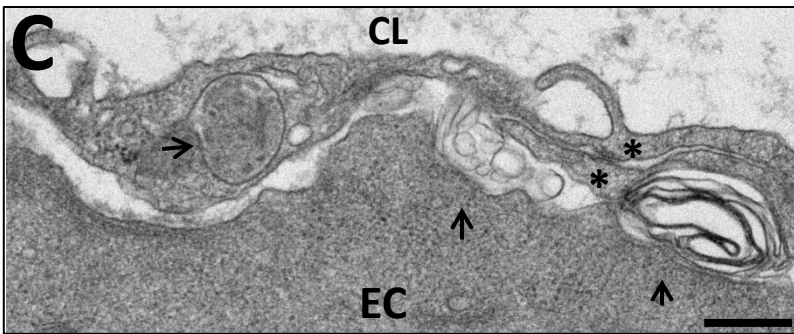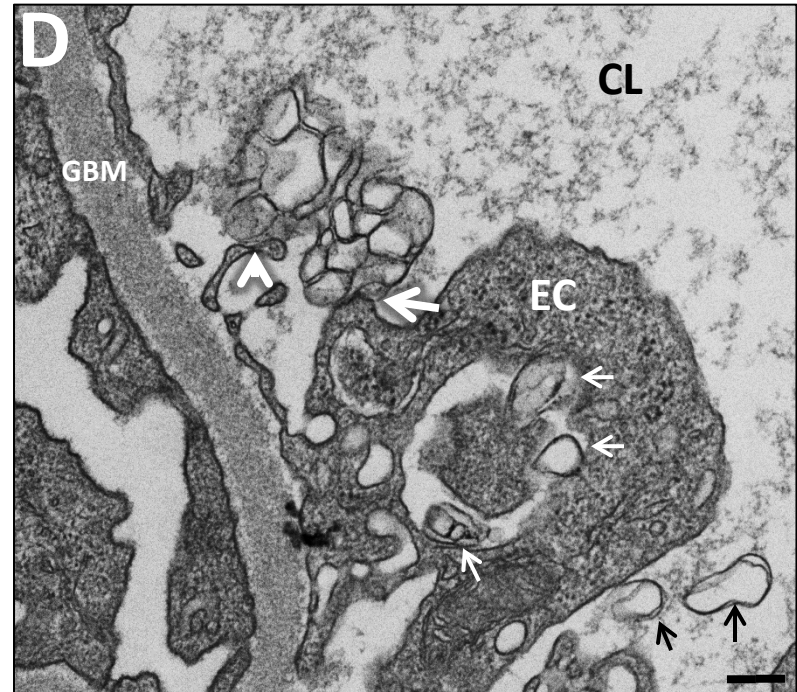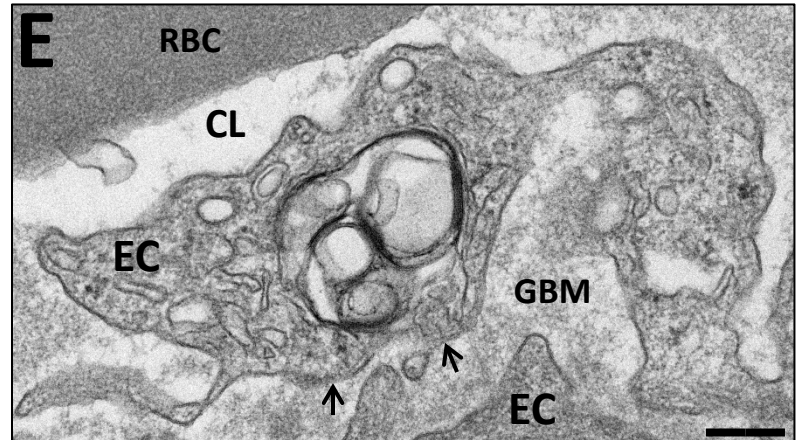

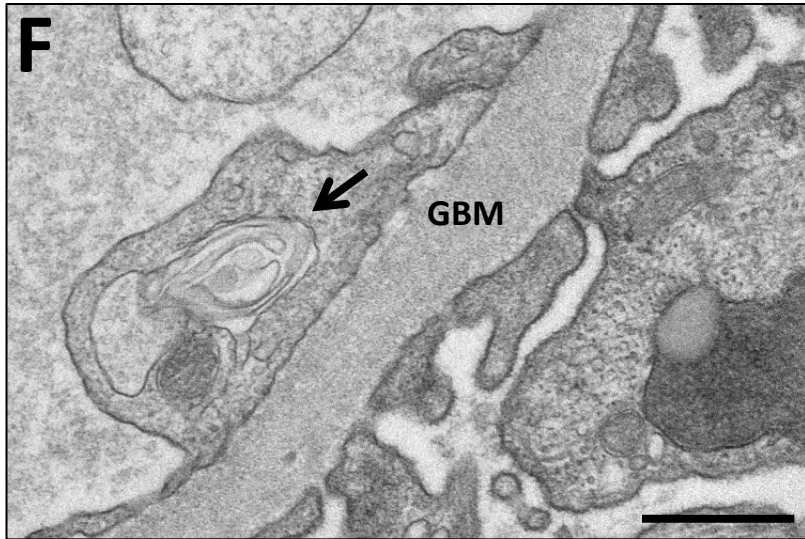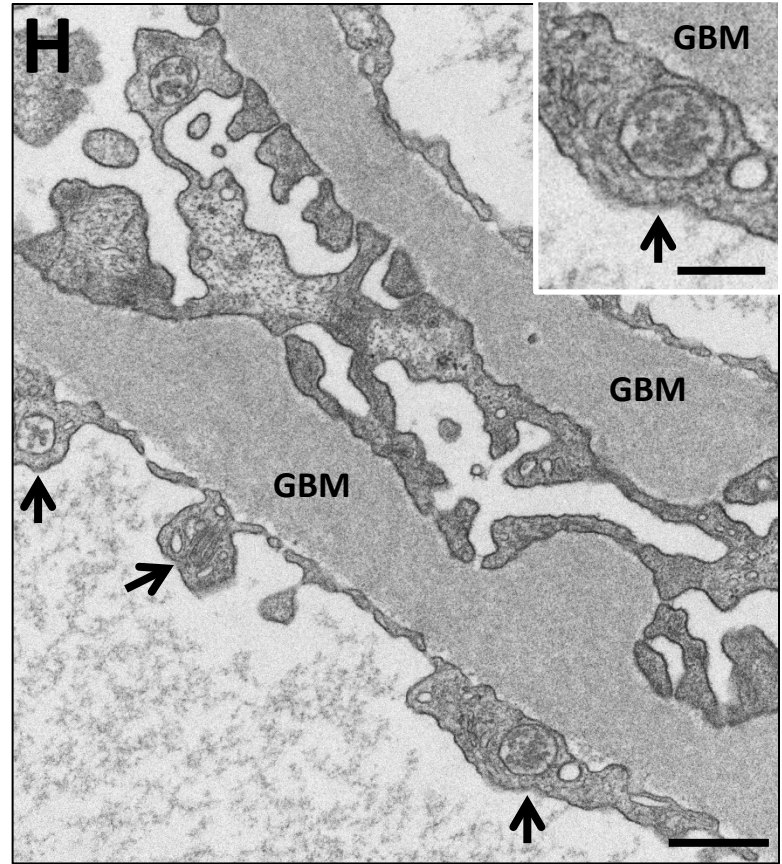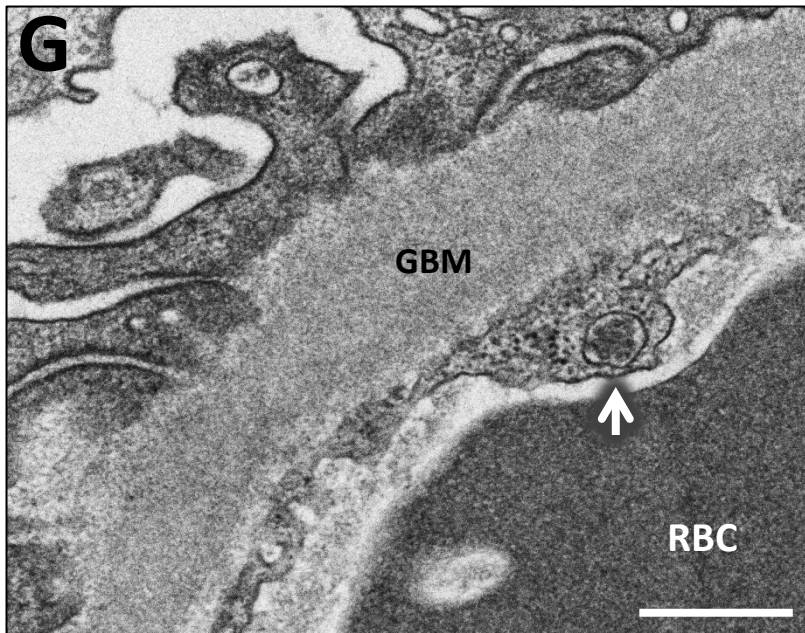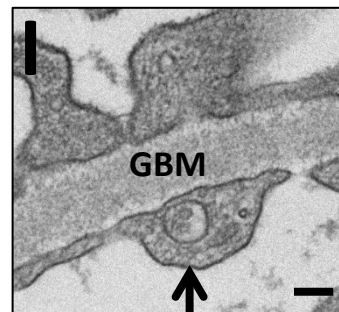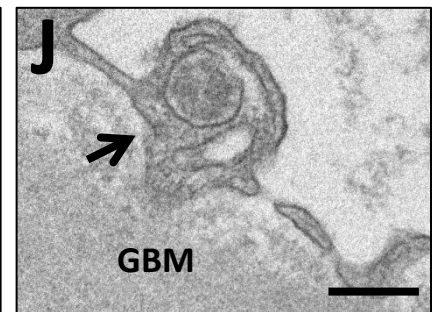

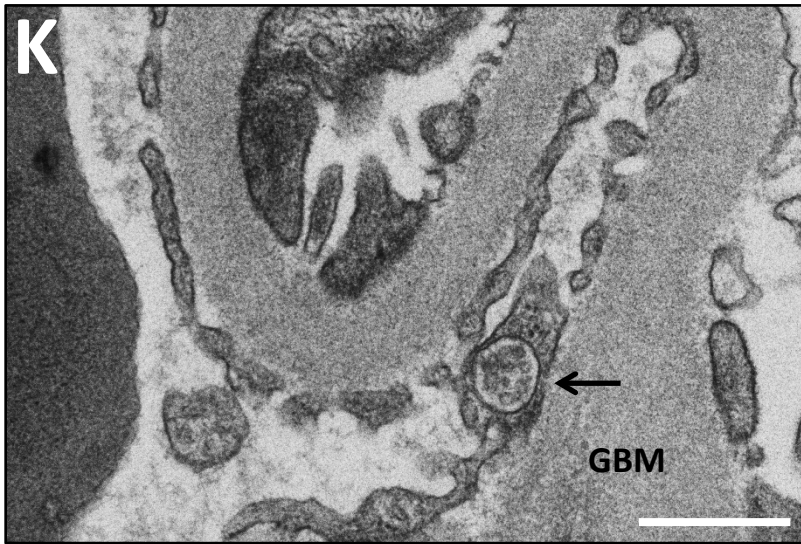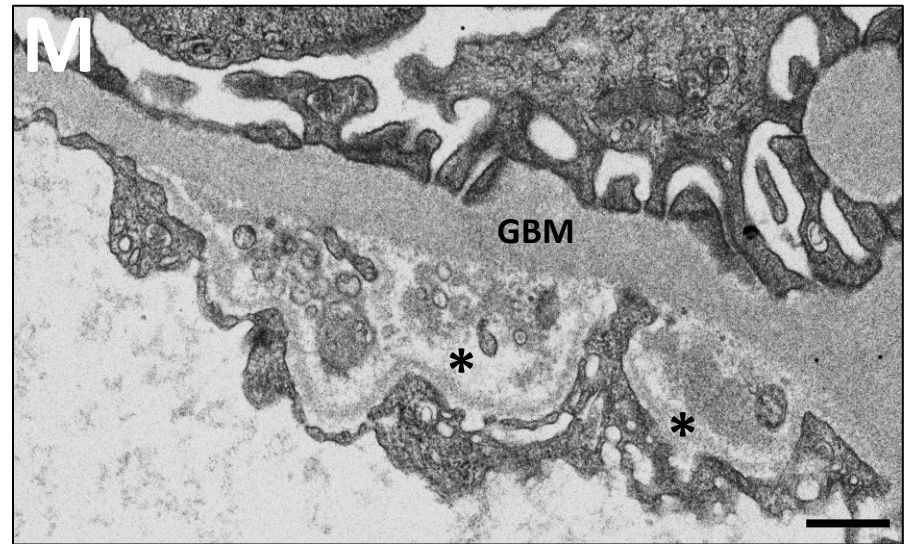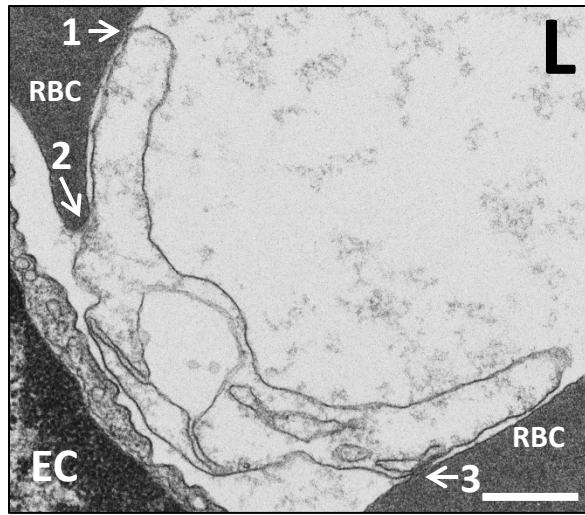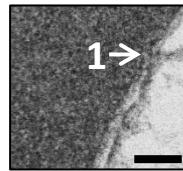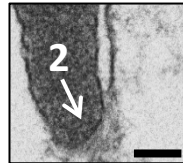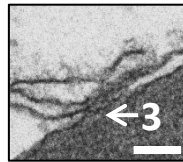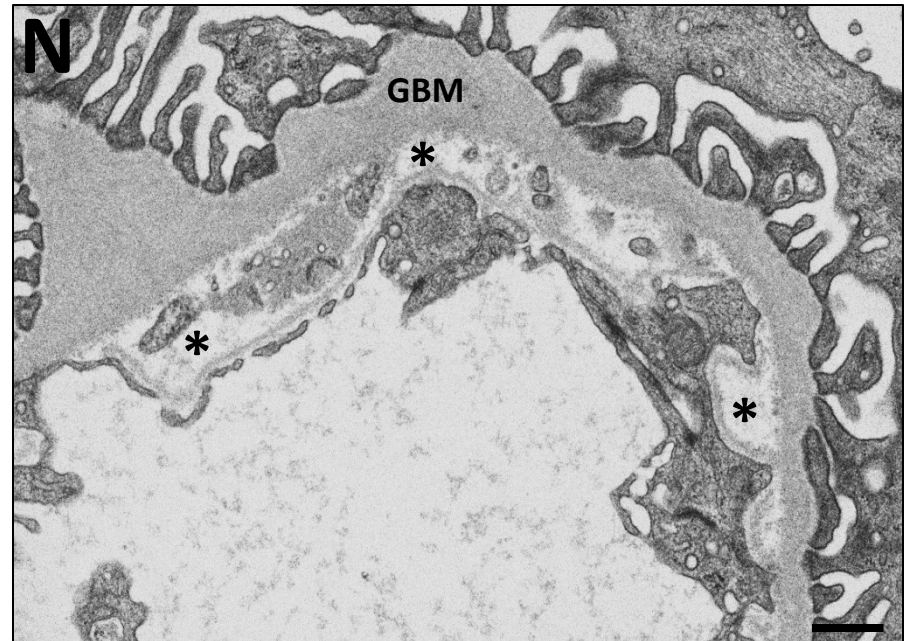

Supplement: pone.0150083.s003.pdf [file pone.0150083.s003.pdf]
