# Supplementary material for: Lipoprotein X Causes Renal Disease in LCAT Deficiency
Source: PubMed Central journal article supplement (PMC4769176; doi:10.1371/journal.pone.0150083), 2016-02-26

**S4**

**Macropinocytotic uptake of LpX by *Lcat*<sup>-/-</sup>  
renal glomerular endothelial cells**

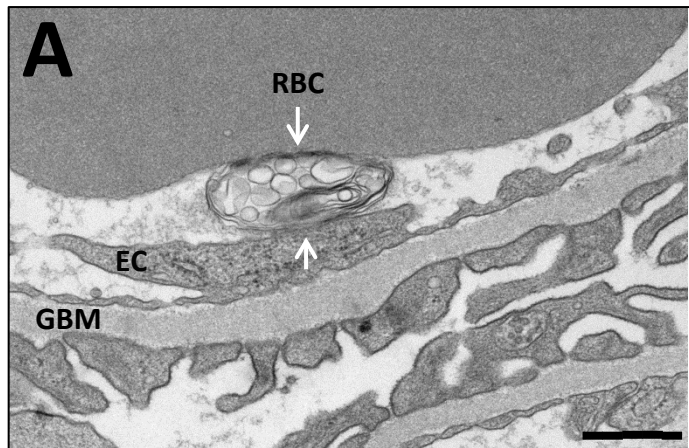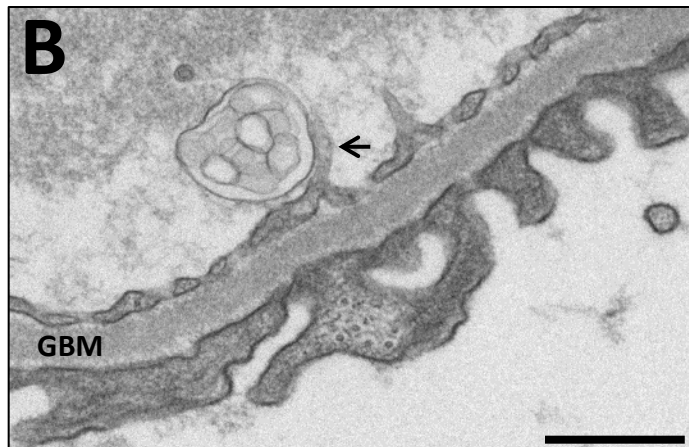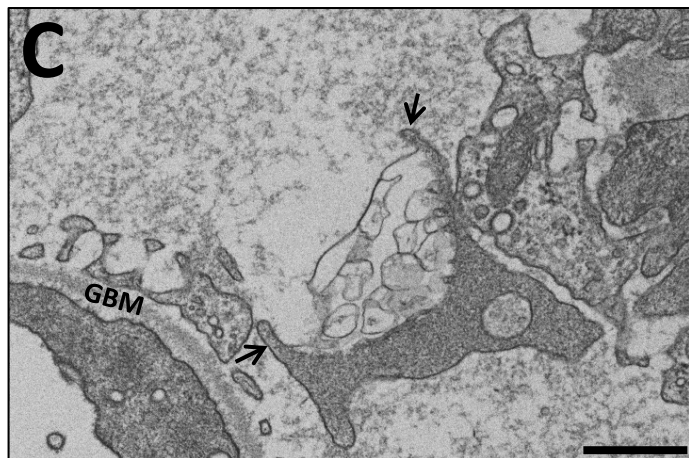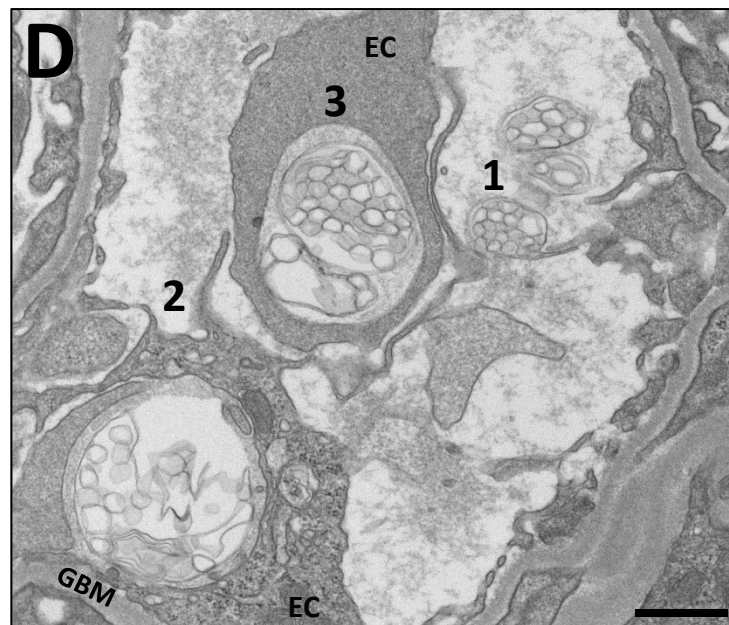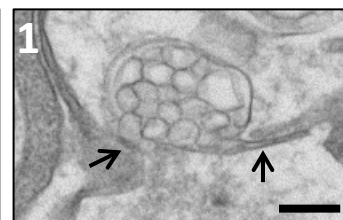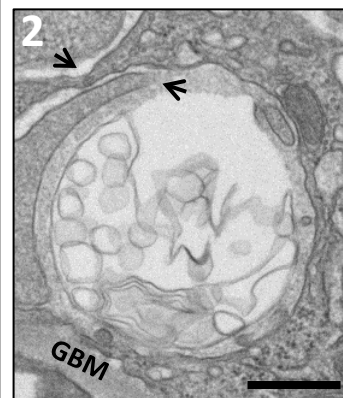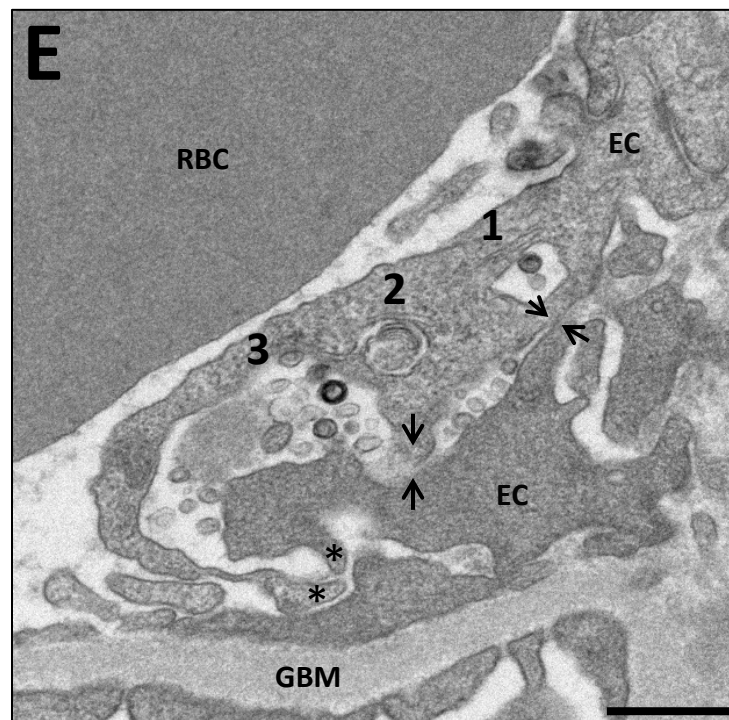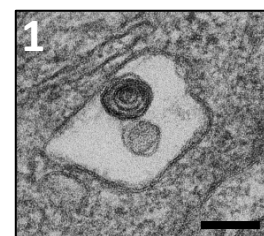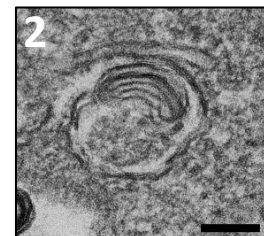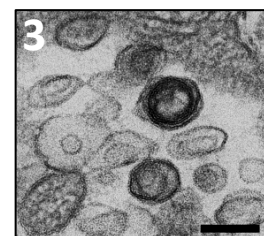

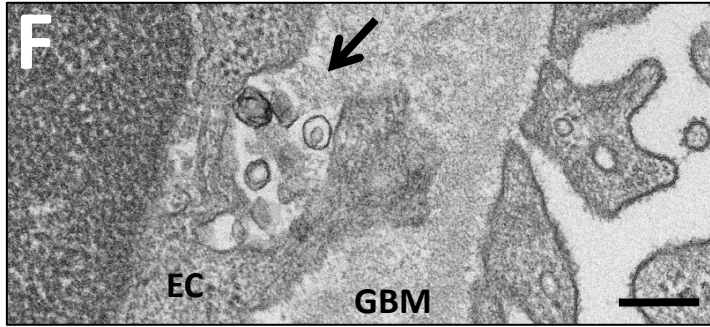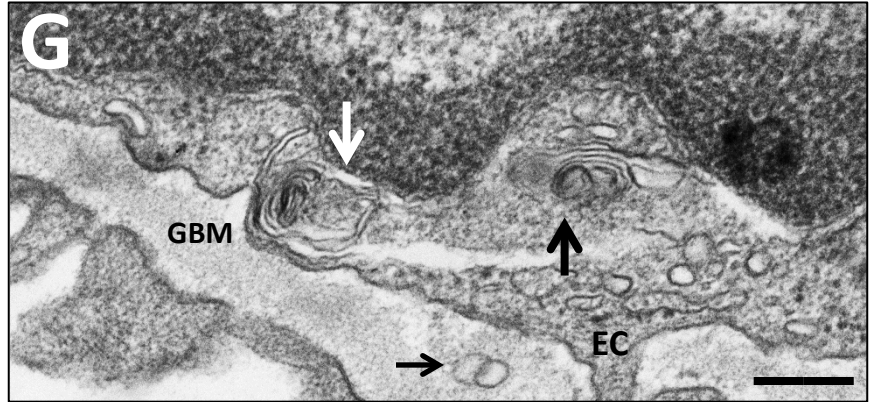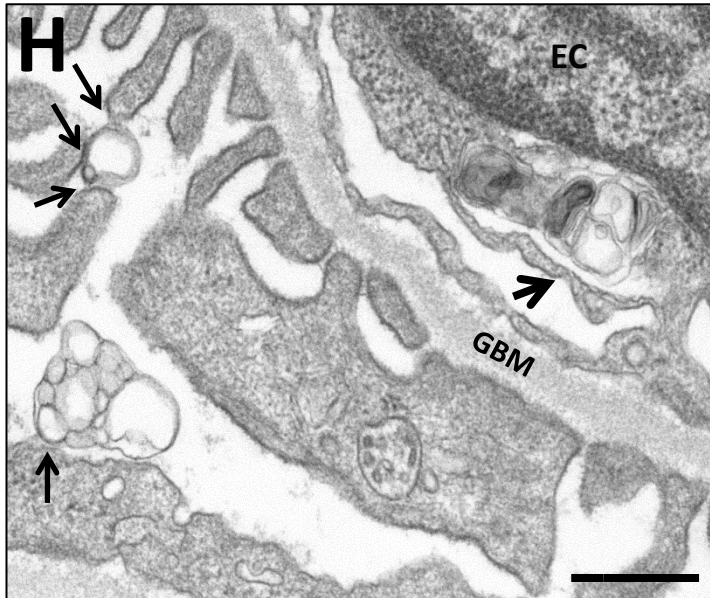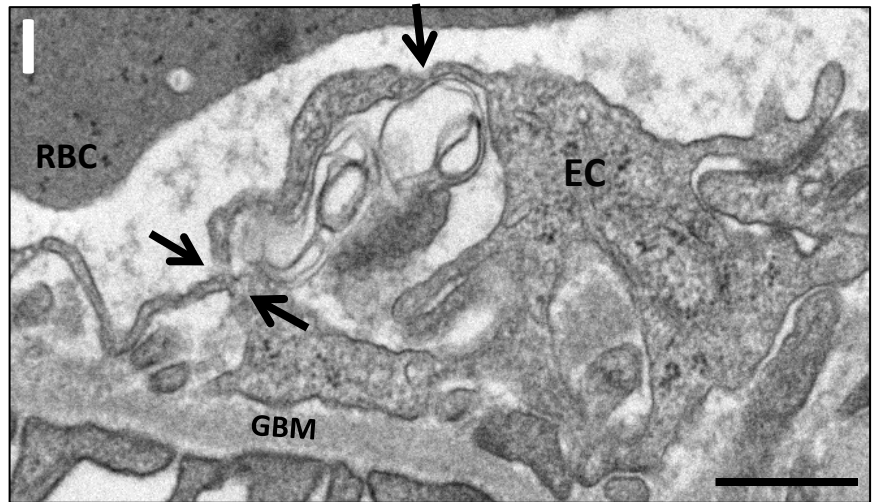

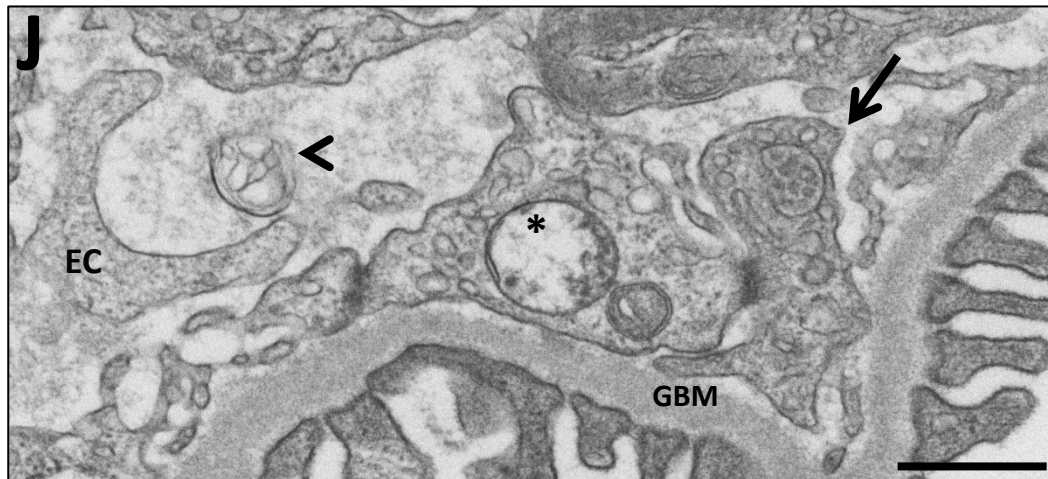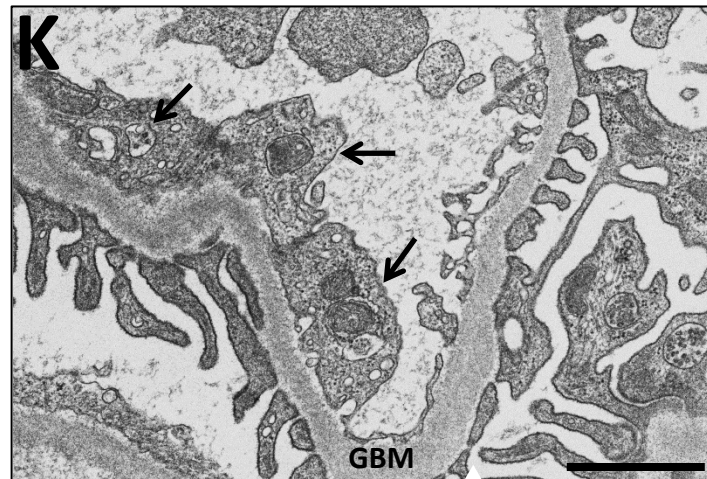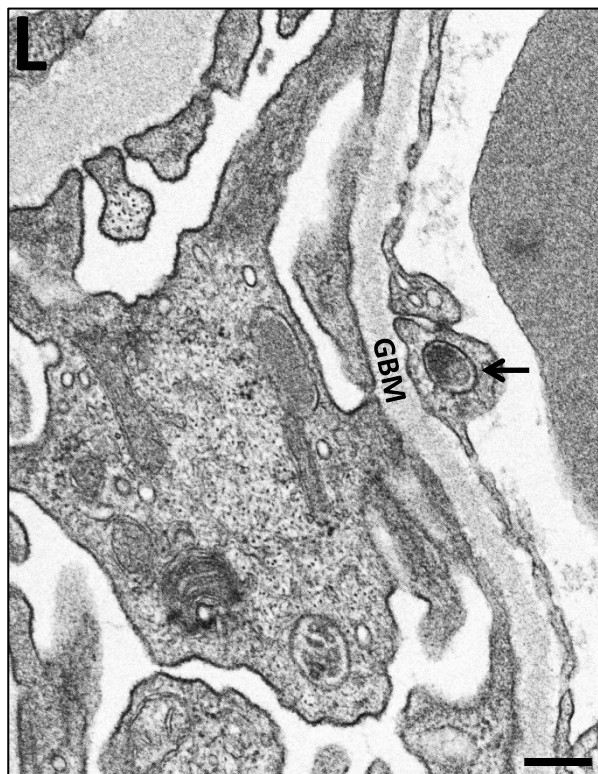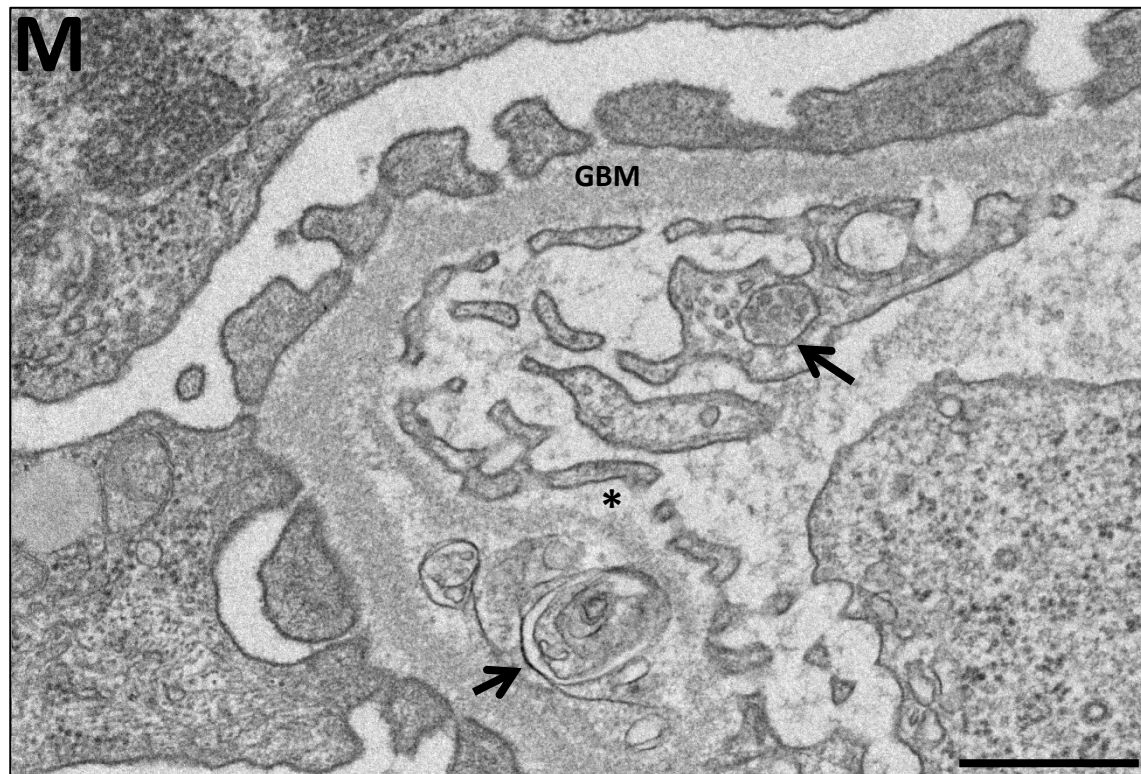

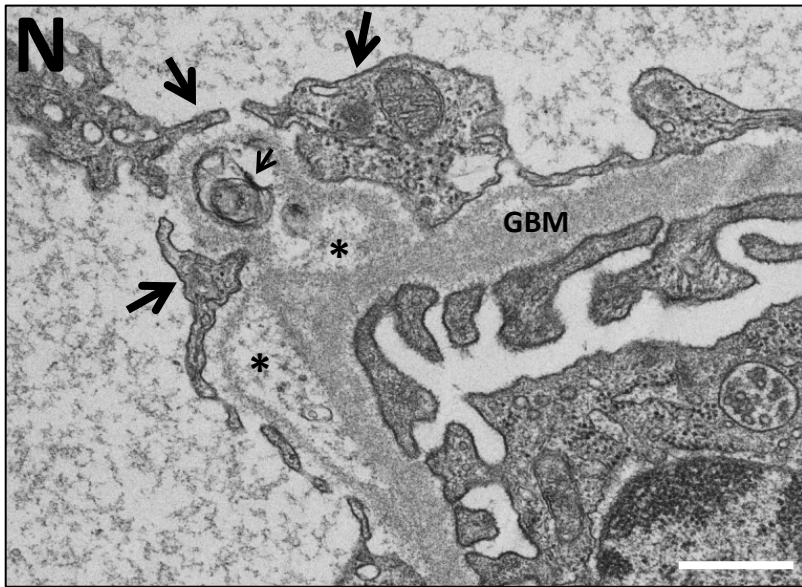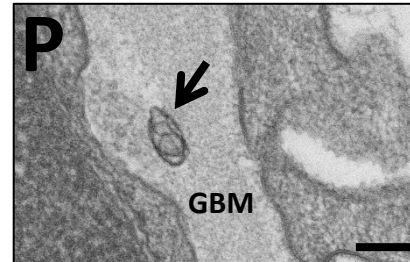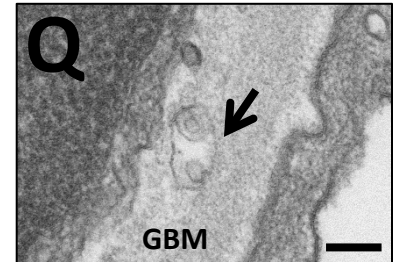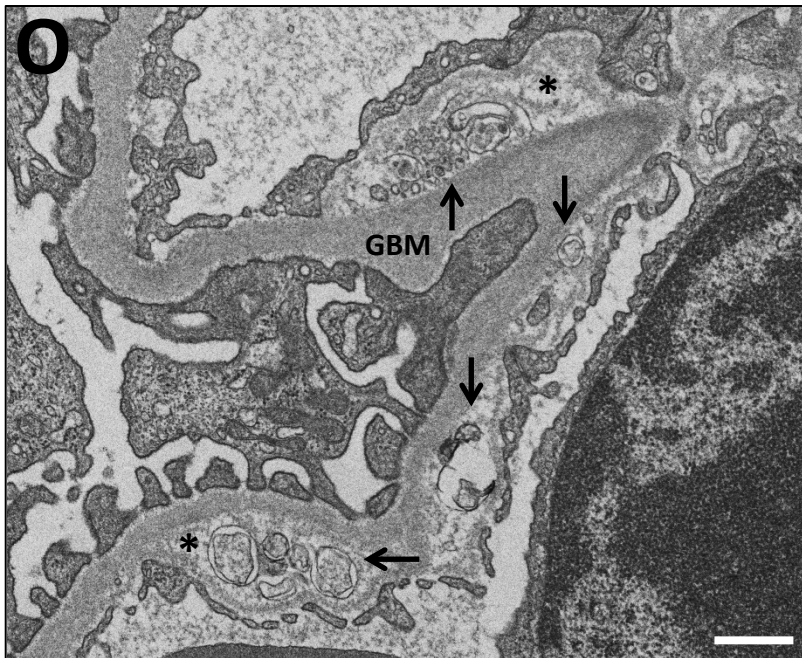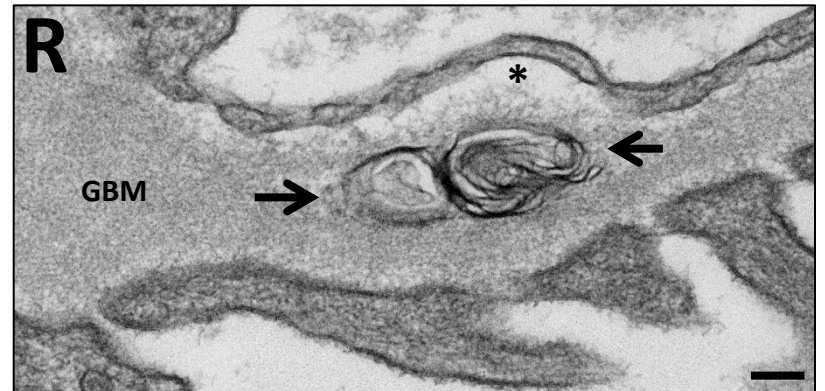

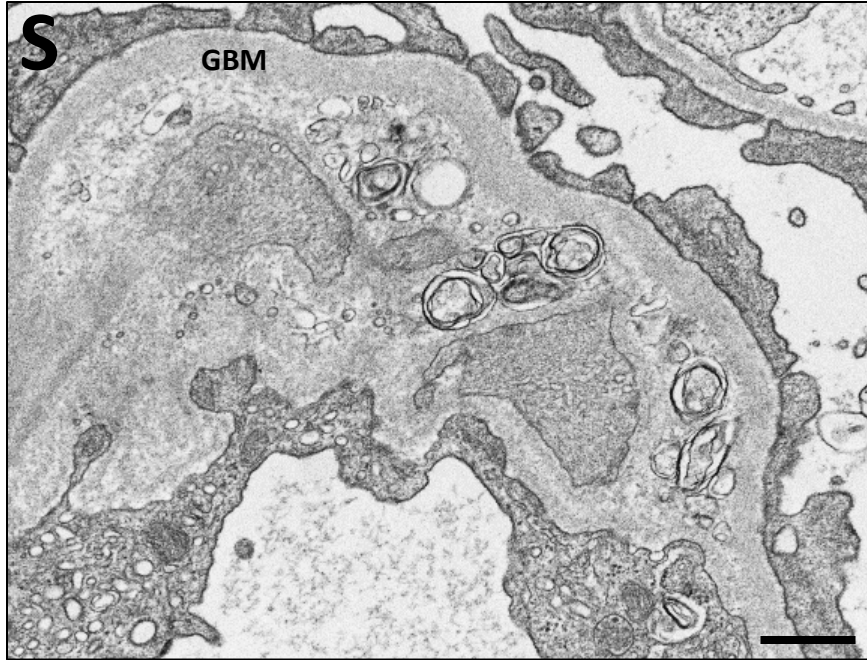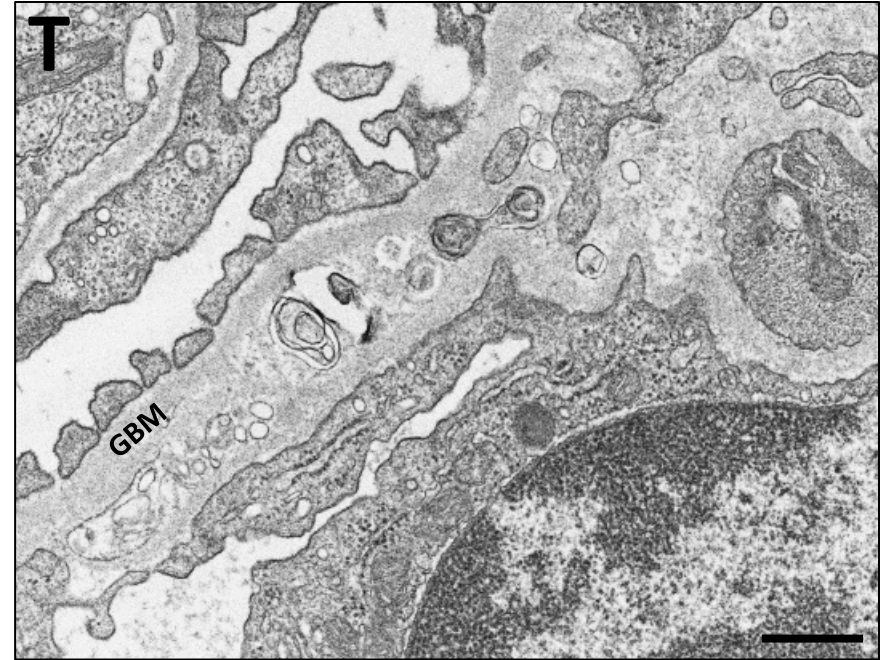

Supplement: pone.0150083.s004.pdf [file pone.0150083.s004.pdf]
