# Supplementary material for: Lipoprotein X Causes Renal Disease in LCAT Deficiency
Source: PubMed Central journal article supplement (PMC4769176; doi:10.1371/journal.pone.0150083), 2016-02-26

# S1

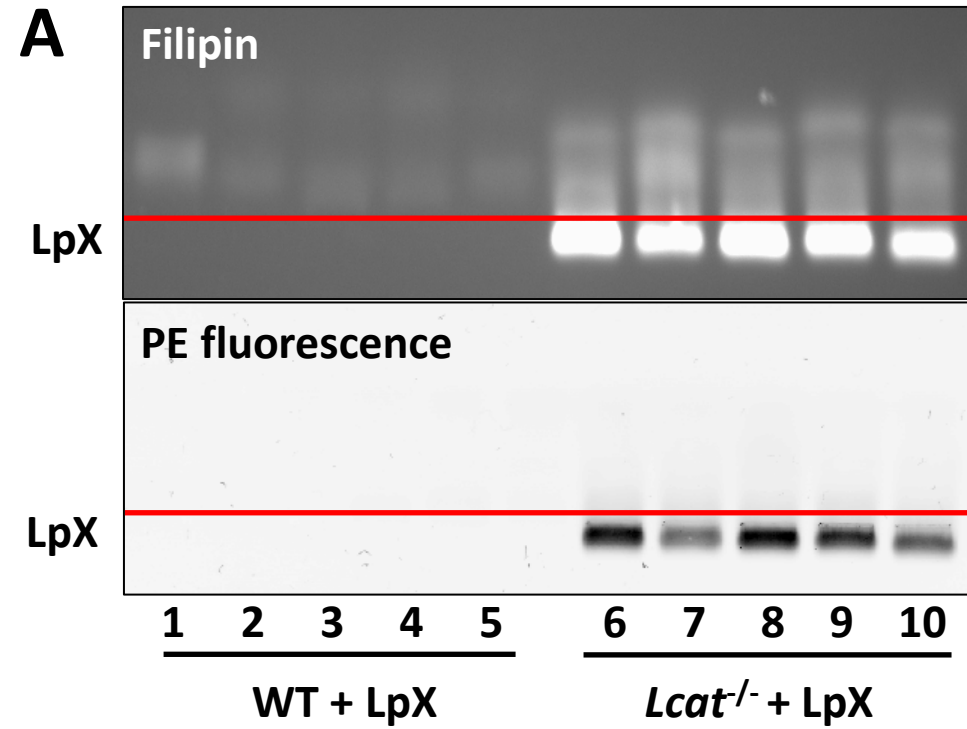

## B

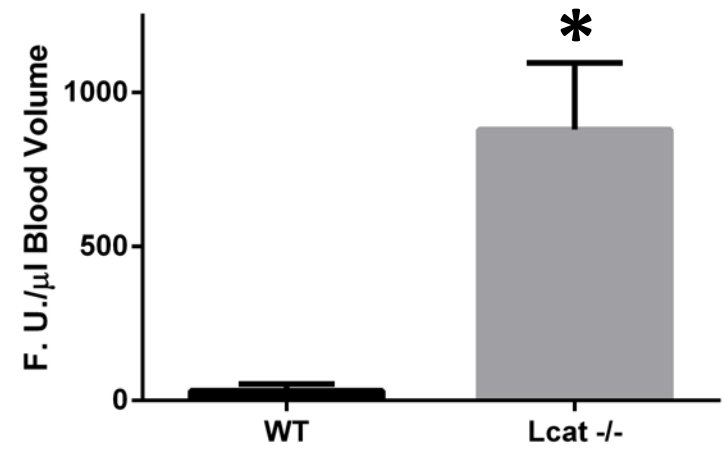

Supplement: pone.0150083.s001.pdf [file pone.0150083.s001.pdf]
