# Supplementary material for: Lipoprotein X Causes Renal Disease in LCAT Deficiency
Source: PubMed Central journal article supplement (PMC4769176; doi:10.1371/journal.pone.0150083), 2016-02-26
Supplement: pone.0150083.s002.pdf [file pone.0150083.s002.pdf]

# S2

**WT**

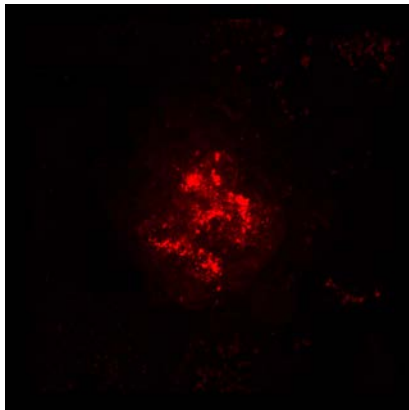

**Renal Glomerulus**

***Lcat*<sup>-/-</sup>**

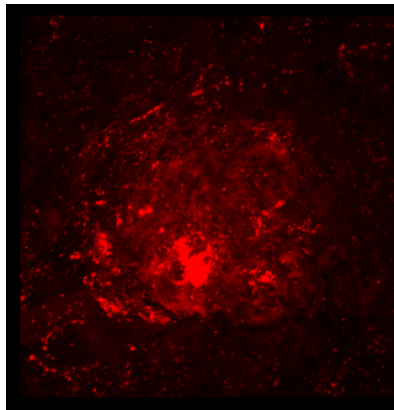

**Renal Glomerulus**

***Lcat*<sup>-/-</sup>**

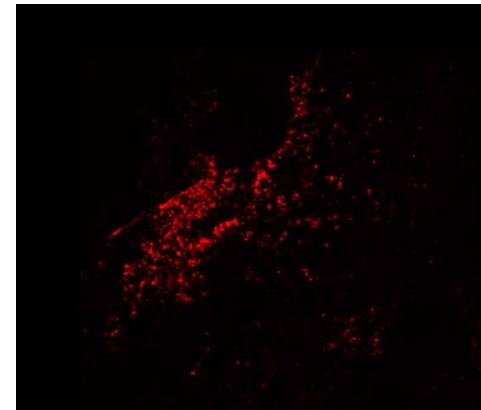

**Renal Tubule**
