# Supplementary material for: Lipoprotein X Causes Renal Disease in LCAT Deficiency
Source: PubMed Central journal article supplement (PMC4769176; doi:10.1371/journal.pone.0150083), 2016-02-26

**S7**

**LpX movement into WT mouse  
glomerular mesangium**

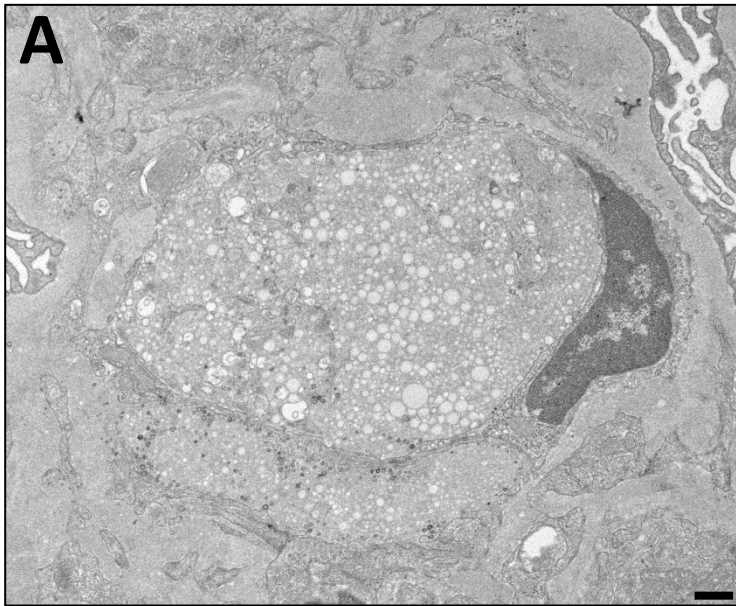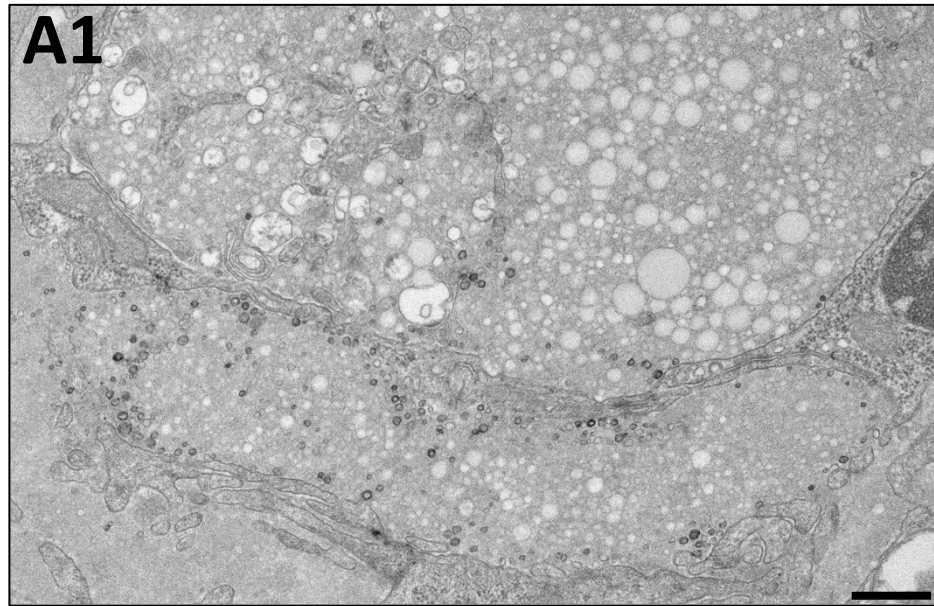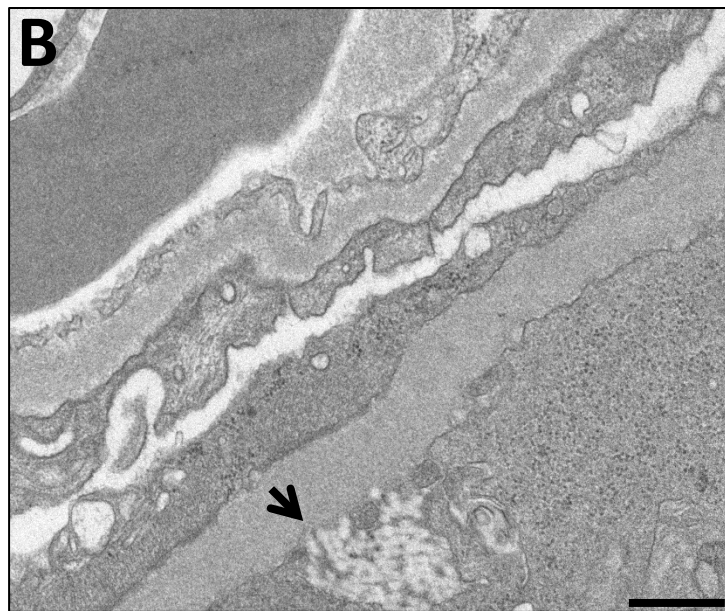

Supplement: pone.0150083.s007.pdf [file pone.0150083.s007.pdf]
